# Supplementary material for: Discrete Hedgehog Factor Expression and Action in the Developing Phallus
Source: MDPI journal article supplement (doi:10.3390/ijms21041237), 2020-02-12
Supplement: s1 [file s1]

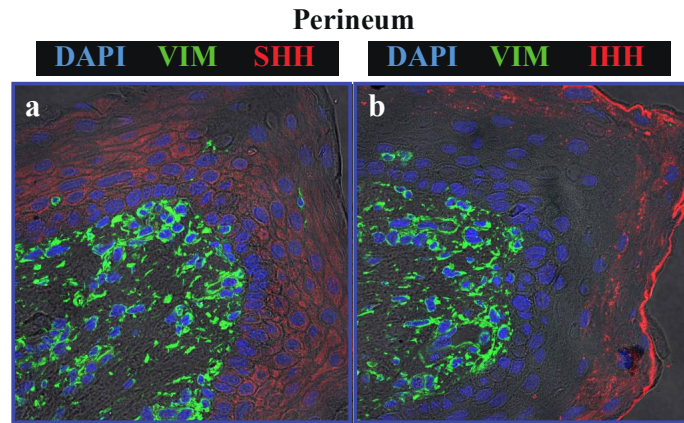

**Supplementary Figure 1.** Segregation of SHH and IHH expression in perineum skin of d60 wallaby. (a) Expression of SHH (red) and vimentin (green), or (b) Expression of IHH (red) and vimentin (green) in sagittal sections of day 60 wallaby phallus tissue.
